# Supplementary material for: Safety and Clinical Effects of Switching From Intravenous to Oral Nimodipine Administration in Aneurysmal Subarachnoid Hemorrhage
Source: Frontiers journal article supplement (doi:10.3389/fneur.2021.748413), 2021-11-16

**Supplemental Figure 1**

Flow diagram of patients included in this study and inclusion and exclusion criteria

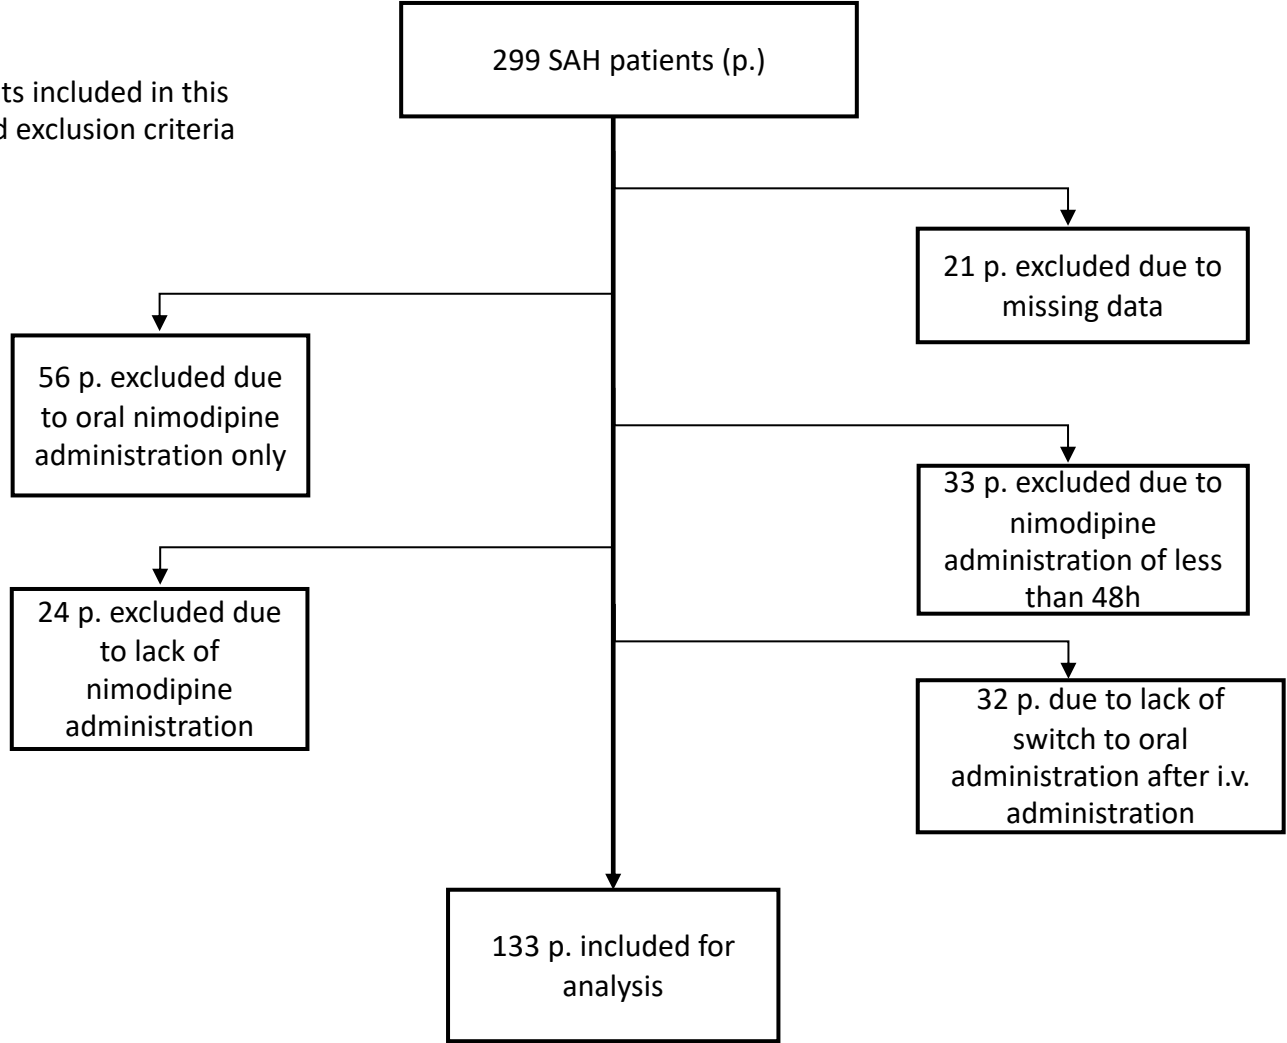

Supplement: Image_1.PDF [file Image_1.PDF]
